# Supplementary material
Source: Elsevier journal article supplement (https://www.sciencedirect.com/science/article/pii/S0300893219301654)
Supplement: mmc1 [file mmc1.pdf]

## **MATERIAL ADICIONAL**

### **ANEXO 1**

#### **Medición de los factores de riesgo cardiovascular**

La presión arterial clínica se midió con un esfigmomanómetro OMRON modelo M10-IT validado (Omron Health Care; Kyoto, Japón). Las mediciones se realizaron siguiendo las recomendaciones de la Sociedad Europea de Hipertensión<sup>1</sup>. La presión arterial media (PAM) se calculó con la ecuación

$$\text{PAM} = (2 \times \text{presión arterial diastólica} + \text{presión arterial sistólica}) / 3.$$

El peso corporal se midió 2 veces con una balanza electrónica certificada (Seca 770; Birmingham, Reino Unido) y calibrada (precisión,  $\pm 0,1$  kg). La altura se midió con un tallímetro (Seca 222; Birmingham, Reino Unido), y se registró el promedio de 2 mediciones. El índice de masa corporal se calculó como el peso en kg dividido por el cuadrado de la estatura en metros. Mediante extracción de sangre venosa en los centros de salud, realizada entre las 8.00 y las 9.00, en ayunas y sin haber fumado ni consumido alcohol ni bebidas con cafeína durante las 12 h anteriores, se determinaron la glucemia plasmática, el colesterol total, el colesterol unido a lipoproteínas de alta densidad (cHDL) y los triglicéridos usando métodos enzimáticos estándar automatizados. El colesterol unido a lipoproteínas de baja densidad (cLDL) se determinó mediante la fórmula de Friedewald, excepto el de los sujetos que tenían las cifras de triglicéridos  $\geq 300$  mg/dl, en cuyo caso se utilizó para el cálculo como cifra de triglicéridos 299 mg/dl ( $n = 5$ ). El índice aterogénico se estimó con la fórmula

$$\text{índice aterogénico} = \text{colesterol total} / \text{cHDL}.$$

Se consideró que una persona tenía hipertensión si estaba tomando fármacos antihipertensivos o tenía una presión arterial  $\geq 140/90$  mmHg. Diabetes mellitus, si estaban tomando hipoglucemiantes o tenían cifras de glucosa en sangre venosa  $\geq 126$  mg/dl o de glucohemoglobina ( $\text{HbA}_{1c}$ )  $\geq 6,5\%$ . Dislipemia, si estaban tomando hipolipemiantes o tenían el colesterol total en ayunas  $\geq 240$  mg/dl o cLDL  $\geq 160$  mg/dl o cHDL  $\leq 40$  mg/dl en los varones y  $\leq 50$  mg/dl en las mujeres o triglicéridos  $\geq 200$  mg/dl. Obesidad, si el índice de masa corporal era  $\geq 30$ . Se definió como fumadores a los sujetos que fumaban en el momento de la evaluación

o que habían dejado de fumar durante el último año. También se recogieron los años de fumador.

## **BIBLIOGRAFÍA**

1. Mancia, G, Fagard, R, Narkiewicz, K, et al., 2013 ESH/ESC Guidelines for the management of arterial hypertension: the Task Force for the management of arterial hypertension of the European Society of Hypertension (ESH) and of the European Society of Cardiology (ESC). *Rev Esp Cardiol.* 2013;66:880-864.

**Tabla 1 del material adicional**

Características de los sujetos a los que no se realizó alguna de las pruebas de función vascular

| Variable          | Sin ICT ni VOP-BT<br>(n = 7) | Sin VOP-CF (n = 8) | Sin IAC (n = 6) |
|-------------------|------------------------------|--------------------|-----------------|
| Edad (años)       | 60,27 ± 12,77                | 65,98 ± 14,02      | 61,17 ± 14,92   |
| Varones           | 4 (57,10)                    | 6 (75,00)          | 3 (50,00)       |
| Tabaquismo        | 2 (28,60)                    | 4 (50,00)          | 3 (50,00)       |
| Dislipemia        | 2 (28,60)                    | 3 (37,50)          | 3 (50,00)       |
| Obesidad          | 5 (71,40)                    | 2 (25,00)          | 2 (33,33)       |
| Diabetes mellitus | 1 (14,30)                    | 1 (12,50)          | 1 (16,70)       |
| Hipertensión      | 4 (57,10)                    | 4 (50,00)          | 3 (50,00)       |

IAC: índice de aumento central; ICT: índice vascular corazón-tobillo; VOP-BT: velocidad de la onda de pulso brazo-tobillo; VOP-CF: velocidad de la onda de pulso carótida-femoral.

**Tabla 2 del material adicional**

Valores medios de los parámetros de función vascular por grupos de edad de la población total y por sexo

| Edad (n)      | Media<br>(IC95%)       | Edad (n)       | Media<br>(IC95%)  | Edad (n)       | Media<br>(IC95%)  |
|---------------|------------------------|----------------|-------------------|----------------|-------------------|
| <b>ICT</b>    | <b>Total (n = 494)</b> | <b>Varones</b> | <b>n = 245</b>    | <b>Mujeres</b> | <b>n = 249</b>    |
| 75 (98) A     | 9,43 (7,6-11,2)        | 75 (50) A      | 9,44 (7,2-11,4)   | 75 (49) A      | 9,42 (7,7-11,5)   |
| 65 (98) B     | 8,79 (7,0-10,7)        | 65 (48) A      | 9,12 (7,0-10,6)   | 65 (51) B      | 8,45 (6,5-11,1)   |
| 55 (98) C     | 8,12 (6,7-9,8)         | 55 (48) B      | 8,30 (6,6-9,9)    | 55 (50) C      | 7,94 (6,5-9,6)    |
| 45 (101) D    | 7,07 (5,7-8,7)         | 45 (50) C      | 7,18 (5,7-8,9)    | 45 (50) D      | 6,97 (5,4-8,7)    |
| 35 (98) E     | 6,57 (5,5-7,7)         | 35 (49) D      | 6,59 (5,2-8,9)    | 35 (49) D      | 6,55 (5,7-7,4)    |
| <b>VOP-BT</b> | <b>Total (n = 494)</b> | <b>Varones</b> | <b>n = 245</b>    | <b>Mujeres</b> | <b>n = 249</b>    |
| 75 (98) A     | 15,78 (12,4-20,2)      | 75 (50) A      | 15,29 (11,8-19,5) | 75 (49) A      | 16,27 (12,7-20,6) |
| 65 (98) B     | 14,40 (11,5-19,3)      | 65 (48) A      | 14,79 (11,6-19,5) | 65 (51) B      | 14,01 (11,4-18,8) |
| 55 (98) C     | 12,72 (10,0-16,6)      | 55 (48) B      | 13,12 (10,4-17,7) | 55 (50) C      | 12,34 (9,9-16,1)  |
| 45 (101) D    | 11,26 (9,5-13,3)       | 45 (50) C      | 11,58 (10,2-14,1) | 45 (50) D      | 10,94 (9,0-13,2)  |
| 35 (98) E     | 10,43 (8,9-12,2)       | 35 (49) C      | 10,93 (9,4-12,5)  | 35 (49) D      | 9,93 (8,7-11,5)   |
| <b>VOP-CF</b> | <b>Total (n =</b>      | <b>Varones</b> | <b>n = 243</b>    | <b>Mujeres</b> | <b>n = 250</b>    |

|            |                   |           |                   |           |                   |
|------------|-------------------|-----------|-------------------|-----------|-------------------|
|            | <b>493)</b>       |           |                   |           |                   |
| 75 (99) A  | 8,77 (5,1-12,8)   | 75 (50) A | 9,43 (4,9-13,9)   | 75 (49) A | 8,15 (5,0-12,6)   |
| 65 (100) B | 7,25 (4,9-10,8)   | 65 (49) B | 7,80 (3,8-11,4)   | 65 (51) B | 6,72 (4,9-9,0)    |
| 55 (97) C  | 6,91 (4,6-8,2)    | 55 (47) C | 7,29 (4,7-7,8)    | 55 (50) C | 6,10 (4,4-8,4)    |
| 45 (100) D | 5,49 (4,1-6,7)    | 45 (49) D | 5,65 (4,2-7,5)    | 45 (51) D | 5,34 (4,0-6,5)    |
| 35 96) D   | 5,01 (3,8-6,5)    | 35 (47) D | 5,25 (4,1-6,7)    | 35 (49) D | 4,78 (3,8-6,1)    |
| IAC        | Total (n = 495)   | Varones   | n = 246           | Mujeres   | n = 249           |
| 75 (98) A  | 33,68 (17,9-55,1) | 75 (49) A | 29,75 (17,0-67,0) | 75 (49) A | 37,61 (22,5-55,0) |
| 65 (100) B | 31,61 (18,1-48,9) | 65 (50) A | 27,38 (16,1-39,0) | 65 (50) A | 35,76 (21,6-54,4) |
| 55 (98) C  | 29,72 (14,9-52,1) | 55 (49) A | 26,20 (14,5-51,0) | 55 (49) A | 33,24 (16,0-53,0) |
| 45 (100) D | 22,21 (2,0-37,0)  | 45 (49) B | 16,84 (0,5-35,5)  | 45 (51) B | 27,37 (14,6-40,0) |
| 35 (98) D  | 16,93 (-3,1-34,0) | 35 (49) C | 10,14 (-8,0-24,5) | 35 (49) B | 23,71 (5,0-36,0)  |

IAC: índice de aumento central; IC95%: intervalo de confianza del 95%; ICT: índice vascular corazón-tobillo; VOP-BT: velocidad de la onda de pulso brazo-tobillo; VOP-CF: velocidad de la onda de pulso carótida-femoral.

Las diferencias entre grupos de edad se han realizado con el análisis de la varianza entre los valores medios del total y por sexo (análisis *post hoc* aplicando la prueba de Bonferroni). Las diferencias entre grupos se han marcado con un código de letras. Los grupos con la misma letra (A, B, C, D y E) no presentan diferencias estadísticamente significativas.

**Tabla 3 del material adicional**

Percentiles de los parámetros de función vascular por grupos de edad y sexo

| ICT     | Edad (n) | P5    | P10   | P25   | P50   | P75   | P90   | P95   |
|---------|----------|-------|-------|-------|-------|-------|-------|-------|
| Varones | 75 (50)  | 8,00  | 8,16  | 8,60  | 9,45  | 10,30 | 11,10 | 11,43 |
| n = 245 | 65 (48)  | 7,23  | 7,91  | 8,50  | 9,15  | 9,50  | 10,33 | 10,64 |
|         | 55 (48)  | 6,57  | 6,90  | 7,57  | 8,15  | 9,00  | 9,75  | 9,95  |
|         | 45 (50)  | 5,75  | 6,05  | 6,42  | 7,05  | 7,87  | 8,50  | 8,90  |
|         | 35 (49)  | 5,16  | 5,71  | 6,05  | 6,52  | 7,12  | 7,49  | 8,86  |
| Mujeres |          |       |       |       |       |       |       |       |
| n = 249 | 75 (49)  | 7,68  | 8,01  | 8,57  | 9,07  | 10,06 | 10,80 | 11,54 |
|         | 65 (51)  | 6,54  | 6,96  | 7,80  | 8,30  | 9,05  | 9,83  | 11,09 |
|         | 55 (50)  | 6,50  | 6,90  | 7,40  | 7,85  | 8,55  | 8,84  | 9,62  |
|         | 45 (50)  | 5,67  | 6,05  | 6,50  | 7,05  | 7,45  | 7,74  | 8,69  |
|         | 35 (49)  | 5,43  | 6,00  | 6,10  | 6,60  | 6,95  | 7,25  | 7,40  |
| VOP-BT  |          |       |       |       |       |       |       |       |
| Varones | 75 (50)  | 11,84 | 12,63 | 13,56 | 15,11 | 16,75 | 18,42 | 19,52 |
| n=245   | 65 (48)  | 11,62 | 12,16 | 13,46 | 14,52 | 15,56 | 18,18 | 19,48 |
|         | 55 (48)  | 10,45 | 10,62 | 11,92 | 12,86 | 13,89 | 15,82 | 17,67 |
|         | 45 (50)  | 10,24 | 10,28 | 10,59 | 11,38 | 12,25 | 12,94 | 14,14 |
|         | 35 (49)  | 9,39  | 9,82  | 10,27 | 10,87 | 11,56 | 12,06 | 12,47 |
| Mujeres |          |       |       |       |       |       |       |       |
| n = 249 | 75 (49)  | 12,70 | 13,32 | 13,85 | 15,99 | 18,31 | 19,75 | 20,65 |
|         | 65 (51)  | 11,37 | 11,60 | 12,55 | 14,04 | 14,60 | 17,32 | 18,78 |
|         | 55 (50)  | 9,11  | 10,17 | 10,96 | 12,29 | 13,41 | 14,51 | 16,15 |
|         | 45 (50)  | 8,99  | 9,49  | 10,18 | 10,94 | 11,58 | 12,28 | 13,23 |
|         | 35 (49)  | 8,75  | 8,85  | 9,37  | 9,76  | 10,38 | 11,13 | 11,49 |
| VOP-CF  |          |       |       |       |       |       |       |       |
| Varones | 75 (50)  | 4,94  | 5,95  | 7,84  | 9,44  | 11,36 | 12,64 | 13,94 |

|         |         |       |       |       |       |       |       |       |
|---------|---------|-------|-------|-------|-------|-------|-------|-------|
| n = 243 | 65 (49) | 4,80  | 5,12  | 6,28  | 7,84  | 9,16  | 10,16 | 11,44 |
|         | 55 (47) | 4,72  | 4,88  | 5,48  | 6,32  | 7,04  | 7,36  | 7,84  |
|         | 45 (49) | 4,08  | 4,40  | 5,08  | 5,52  | 6,38  | 6,72  | 7,48  |
|         | 35 (47) | 4,02  | 4,38  | 4,64  | 5,20  | 5,64  | 6,40  | 6,72  |
| Mujeres |         |       |       |       |       |       |       |       |
| n = 250 | 75 (49) | 4,96  | 5,92  | 6,68  | 7,76  | 9,28  | 10,64 | 12,60 |
|         | 65 (51) | 4,88  | 5,30  | 5,60  | 6,40  | 7,28  | 8,43  | 8,98  |
|         | 55 (50) | 4,44  | 4,64  | 5,36  | 5,84  | 6,68  | 7,50  | 8,36  |
|         | 45 (51) | 4,05  | 4,35  | 4,88  | 5,28  | 5,76  | 6,30  | 6,50  |
|         | 35 (49) | 3,76  | 4,00  | 4,24  | 4,80  | 5,20  | 5,84  | 6,08  |
| IAC     |         |       |       |       |       |       |       |       |
| Varones | 75 (49) | 17,00 | 18,50 | 23,50 | 28,00 | 32,00 | 41,00 | 67,00 |
| n = 246 | 65 (50) | 16,10 | 18,10 | 22,75 | 27,50 | 32,25 | 36,00 | 39,00 |
|         | 55 (49) | 14,50 | 15,00 | 19,00 | 23,00 | 19,50 | 37,00 | 51,00 |
|         | 45 (49) | 0,50  | 2,00  | 9,00  | 17,00 | 21,00 | 31,00 | 35,50 |
|         | 35 (49) | -8,00 | -3,00 | 3,00  | 9,00  | 15,50 | 21,00 | 24,50 |
| Mujeres |         |       |       |       |       |       |       |       |
| n = 249 | 75 (49) | 22,50 | 30,00 | 32,50 | 36,00 | 42,50 | 49,00 | 53,50 |
|         | 65 (50) | 21,60 | 24,20 | 31,00 | 35,00 | 40,00 | 46,80 | 51,40 |
|         | 55 (49) | 16,00 | 21,00 | 26,00 | 33,00 | 41,00 | 48,00 | 53,00 |
|         | 45 (51) | 14,60 | 15,20 | 24,00 | 28,00 | 33,00 | 36,00 | 40,00 |
|         | 35 (49) | 5,00  | 9,00  | 20,50 | 25,00 | 29,00 | 33,00 | 36,00 |

IAC: índice de aumento central; ICT: índice vascular corazón-tobillo; VOP-BT: velocidad de la onda de pulso brazo-tobillo; VOP-CF: velocidad de la onda de pulso carótida-femoral.

**Tabla 4 del material adicional**

Correlaciones entre las cuatro medidas de rigidez arterial analizadas

|        | VOP-CF | VOP-BT | IAC    |
|--------|--------|--------|--------|
| ICT    | 0,602* | 0,830* | 0,372* |
| VOP-CF |        | 0,716* | 0,354* |
| VOP-BT |        |        | 0,251* |

IAC: índice de aumento central; ICT: índice vascular corazón-tobillo; VOP-BT: velocidad de la onda de pulso brazo-tobillo; VOP-CF: velocidad de la onda de pulso carótida-femoral.

\*p < 0,001.

### **Tabla 5 del material adicional**

Incremento de las medidas de rigidez por década de edad de la población total y por sexo

|        | Total                   | Varones                 | Mujeres                 |
|--------|-------------------------|-------------------------|-------------------------|
| ICT    | 0,71 (IC95%, 0,57-0,85) | 0,77 (IC95%, 0,57-0,97) | 0,66 (IC95%, 0,46-0,85) |
| VOP-BT | 1,11(IC95%, 0,88-1,35)  | 1,08 (IC95%, 0,75-1,42) | 1,07 (IC95%, 0,75-1,38) |
| VOP-CF | 0,87 (IC95%, 0,67-1,08) | 1,03 (IC95%, 0,68-1,37) | 0,60 (IC95%, 0,38-0,82) |
| IAC    | 3,72 (IC95%, 2,22-5,22) | 4,15 (IC95%, 1,78-6,52) | 3,06 (IC95%, 1,09-5,02) |

IAC: índice de aumento central; ICT: índice vascular corazón-tobillo; VOP-BT: velocidad de la onda de pulso brazo-tobillo; VOP-CF: velocidad de la onda de pulso carótida-femoral.

Análisis de regresión múltiple utilizando como variables dependientes el ICT, la VOP-BT, la VOP-CF y el IAC, como variables independientes la década de edad y como variables de ajuste el sexo, la presión arterial media, la glucohemoglobina, el índice de masa corporal, el índice aterogénico y los años de fumador.

**Figura 1.** Diagrama de flujo del estudio. Indica la población de referencia por grupo de edad de la población total y por sexo, los sujetos incluidos y excluidos y las principales causas de exclusión. No cumplían criterios de inclusión 259 sujetos. No aceptaron participar en el estudio 177 y no se pudo localizar por haber cambiado de domicilio o de número de teléfono a 74 sujetos. La tasa de reposición fue del 35,4% y la tasa de respuesta, del 64,6%. ♂: varones; ♀: mujeres.

**Figura 2.** Valores por grupo de edad y sexo de las medidas de la rigidez arterial utilizadas. Las cajas contienen el 50% de los datos; las líneas horizontales indican los valores de las medianas y los círculos, los valores extremos. El valor de p indica la diferencia en los valores medios entre varones y mujeres de cada grupo de edad. IAC: índice de aumento central; ICT: índice vascular corazón-tobillo; VOP-BT: velocidad de la onda de pulso brazo-tobillo; VOP-CF: velocidad de la onda de pulso carótida-femoral.
