# Supplementary material
Source: Elsevier journal article supplement (https://www.sciencedirect.com/science/article/pii/S0300893219301654)

Populación de referencia: 43.946; ♂: 19.762; ♀: 24.184

Año de nacimiento 1941:  
1.224 (♂: 506, ♀: 718)

Incluidos 100 (♂: 50, ♀: 50)

Excluidos 182 (♂: 131, ♀: 51)

Causas de exclusión

No cumple criterios de  
inclusión: 145 No aceptan: 32  
Otras: 5

Año de nacimiento 1951:  
2.005 (♂: 880, ♀: 1125)

Incluidos 101 (♂: 50, ♀: 51)

Excluidos 96 (♂: 70, ♀: 26)

No criterios de inclusión: 58  
No aceptan: 36  
Otras: 2

Año de nacimiento 1961:  
2.367 (♂: 1057, ♀: 1310)

Incluidos 99 (♂: 49, ♀: 50)

Excluidos 61 (♂: 30, ♀: 31)

No criterios de inclusión: 28  
No aceptan: 29  
Otras: 4

Año de nacimiento 1971:  
2.302 (♂: 1028, ♀: 1274)

Incluidos 101 (♂: 50, ♀: 51)

Excluidos 79 (♂: 53, ♀: 26)

No criterios de inclusión: 21  
No aceptan: 46  
Otras: 12

Año de nacimiento 1981:  
2.288 (♂: 1091, ♀: 1197)

Incluidos 100 (♂: 50, ♀: 50)

Excluidos 92 (♂: 51, ♀: 41)

No criterios de inclusión: 7  
No aceptan: 34  
Otras: 51

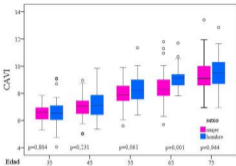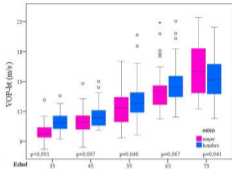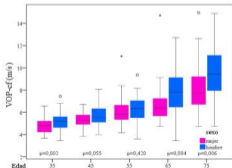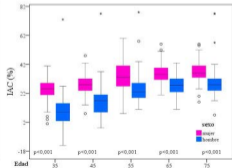

Supplement: mmc2 [file mmc2.pdf]
